# Supplementary material for: ContextMap 2: fast and accurate context-based RNA-seq mapping
Source: PubMed Central journal article supplement (PMC4411664; doi:10.1186/s12859-015-0557-5), 2015-04-17
Supplement: 12859_2015_557_MOESM1_ESM.pdf [file 12859_2015_557_MOESM1_ESM.pdf]

# ContextMap 2: Fast and accurate context-based RNA-seq mapping

## Supplementary Methods and Figures

### Alignment extension for split alignments

In step 3 (Figure 1 C in the main manuscript) of ContextMap 2, additional alignments are created within each context based on the initial alignments determined in step 1. For partial and full alignments, this is described in the main manuscript. Similarly, additional alignments are determined for split alignments. The input for this extension is the set of single-split alignments determined in step 1. Each single-split alignment consists of a combination of continuous alignments beginning at the read start and the read end separated by the predicted intron (Supplementary Figure 1 A). The ends of this intron represent the predicted splice sites. Here, step 1 determines only one split alignment with the minimum number of mismatches for each combination of alignment start (anchor A in Supplementary Figure 1 A) and alignment end (anchor B in Supplementary Figure 1 A).

However, other split alignments may be possible for the same combination of alignment start and end with the same number of mismatches or only a few more (the difference in mismatches allowed is provided by the user using the maximum mismatch difference [*mmdiff*] parameter). These alignments are determined in step 3 of ContextMap 2 by shifting the position of the splice sites as shown in Supplementary Figure 1 B.

Furthermore, single-split alignments are checked for overlaps with split alignments of other reads indicating an additional split within the continuously aligned regions. If an overlap is found, the single-split alignment is extended to a multi-split alignment if the number of mismatches does not exceed the predefined maximum mismatch criterion. Here, only single-split alignments of the whole read are extended to two-split alignments, but not single-split alignments of read fragments obtained for candidate multi-split alignments. As a consequence, ContextMap 2 can determine multi-split alignments with two junctions for which the internal exon is shorter than the minimum exon size  $e$  used for defining the fragments in the detection of multi-split alignments. Multi-split alignments with more than two splits and at least one internal exon shorter than  $e$  are not found.

This results in a set of alternative split alignments for each read with at most the maximum number of allowed mismatches. Resolution of these multiple alignments is then performed in step 4 and 5 of ContextMap 2.

### Resolution of overlapping splice sites

This is part of step 4 of ContextMap 2, in which multiple alignments are resolved within contexts. Here, splice sites are eliminated which are very close to each other and suggested by alternative split alignments of the same read with the same alignment start and end but different position of the splice site. Elimination is based on the evidence for different splice sites provided by all reads. Although it might appear counterintuitive that alternative split alignments are first created in step 3 of ContextMap 2 and then some are deleted again, this guarantees that all reads with a valid split alignment using this splice site are included in calculating the evidence score.

Two splice sites  $(s_{1,1}, s_{1,2})$  and  $(s_{2,1}, s_{2,2})$  are considered overlapping if both  $|s_{1,1} - s_{2,1}|$  and  $|s_{1,2} - s_{2,2}|$  are smaller than the maximum read length. Here,  $s_{i,1}$  denotes the genome position of the end of the first exon and  $s_{i,2}$  the start of the second exon. While in the original ContextMap implementation only one splice site from a set of overlapping splice sites was used, ContextMap 2 retains the three splice sites

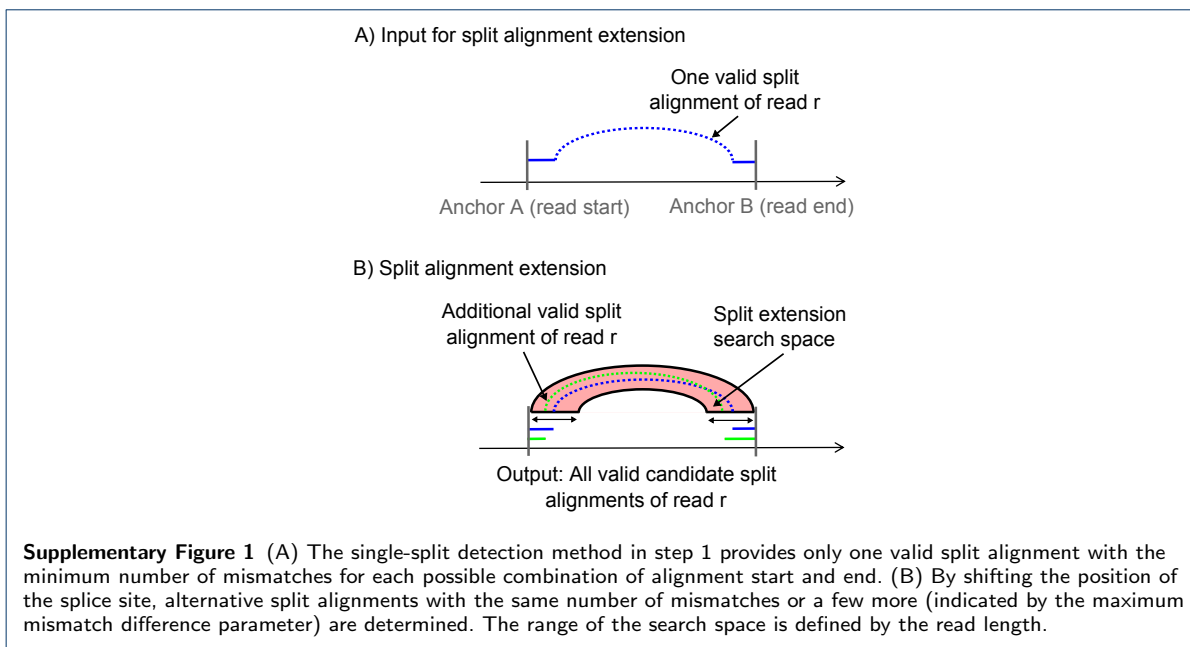

from each set with the highest evidence score (see Supplementary Figure 2). This allows the detection of alternative 3' or 5' splice sites.

ContextMap 2 uses a similar evidence score as in the original ContextMap version. The major difference involves the treatment of gene annotation (if provided) and known splice signals. If at least one splice site within the set of overlapping splice sites corresponds to an annotated exon-exon junction or shows a known splice signal, all other splice sites not corresponding to a known exon-exon junction or having no known splice signal are discarded. The evidence score used for evaluating the remaining splice sites is calculated as follows. Let  $n_i$  be the number of reads (full, split or partial) with  $i$  mismatches supporting the splice site pair and  $m$  the maximum number of mismatches allowed. Then the evidence score is defined as:

$$evidence = \sum_{i=0}^m (w^i \cdot n_i) \quad (1)$$

Here,  $w$  is a value  $< 1$  (default  $w = 0.3$ ). Thus, the score is the weighted sum of the number of reads with the weight decreasing exponentially with the number of mismatches.

For each set of pairwise overlapping splice sites, the three splice sites with the highest evidence scores are selected. Split read alignments containing the discarded splice sites are discarded. If more than one split alignment remains for a read to any of the remaining three splice sites, the split alignment to the splice site with highest evidence score is retained and all others discarded.

#### Resolution of multiple read alignments

ContextMap 2 resolves multiple read alignments first within each context in step 4 and subsequently between the contexts in step 5. For this purpose, a support score is calculated for each alignment based on the number of reads aligned within and around the context. In the original ContextMap implementation,

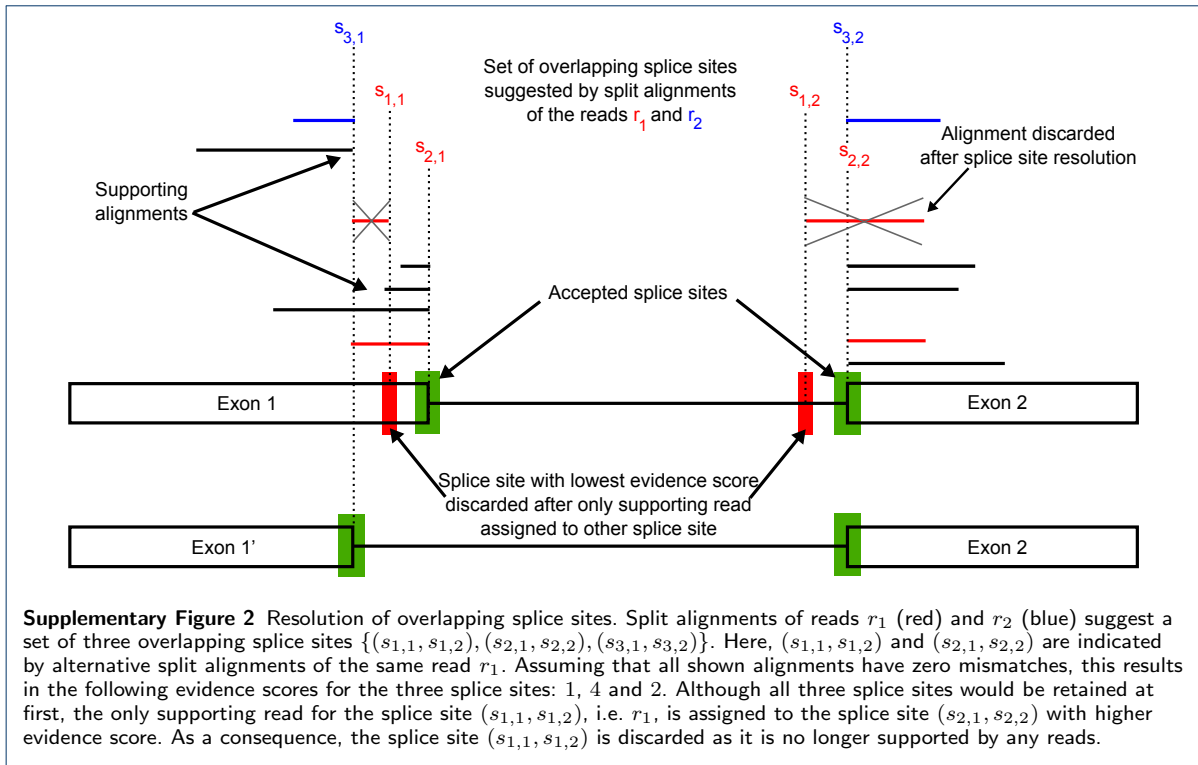

the score was defined as (see Supplementary Figure 3 A)

$$support = \sum_{i=1}^4 2^{4-i} \cdot \lfloor \ln(score_i) \rfloor. \quad (2)$$

Here,  $score_1$  was defined as the maximum number of reads mapping to any position within the region the read is aligned.  $score_2$  was the maximum in a window of 200 nt either upstream of the read start or downstream of the read end.  $score_3$  was the maximum  $> 200$  but  $\leq 500$  nt from read start or end. Finally,  $score_4$  was the maximum  $> 500$  but  $\leq 1000$  nt from read start or end.

To better distinguish between different alignments for a read that are identical on one but not the other side of the read, the support score in ContextMap 2 was modified such that maximum read counts on both sides of the of read alignment are included separately in the score. Furthermore, we reduced the number of considered windows around the read alignment and their respective sizes since the considered region was much larger than an average exon (Supplementary Figure 3 B). The new support score is then defined as

$$support = 2^3 \cdot \lfloor \ln(score_1) \rfloor + \sum_{i=2}^3 2^{4-i} \cdot (\lfloor \ln(score_{-i}) \rfloor + \lfloor \ln(score_i) \rfloor). \quad (3)$$

Here,  $score_{-i}$  and  $score_i$  were defined as the maximum read counts in the corresponding intervals upstream and downstream of the read alignment, respectively. For reads with multiple alignments, the

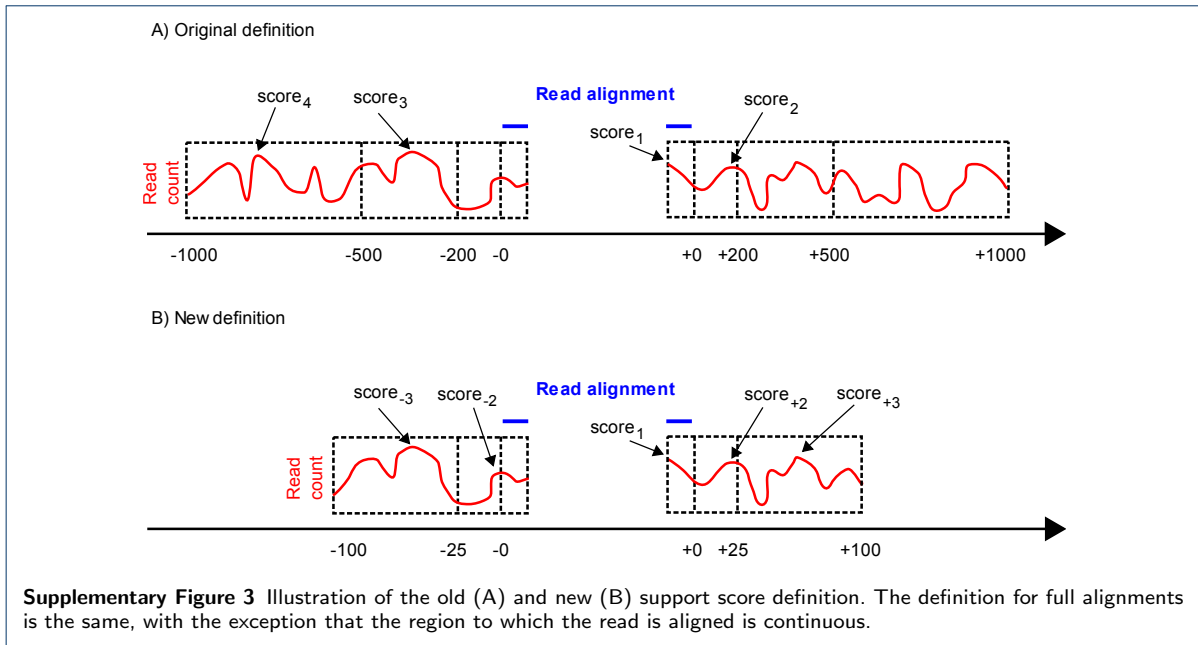

count was  $1/(\# \text{multiple alignments of read within context})$  for step 4 and  $1/(\# \text{multiple alignments of read between contexts})$  for step 5 of ContextMap 2.

Thus, if many reads are aligned to the same region, indicating that this region is actually expressed, the score of the alignment is high. If only few other reads are aligned to the same region as the read, the score of the alignment is low. Among several alternative alignments for the same read within each context, the one with the largest support score is then chosen. Finally, reads aligned to several different contexts are resolved in the same way in step 5 after recalculating support scores based on the read alignments chosen for each context.

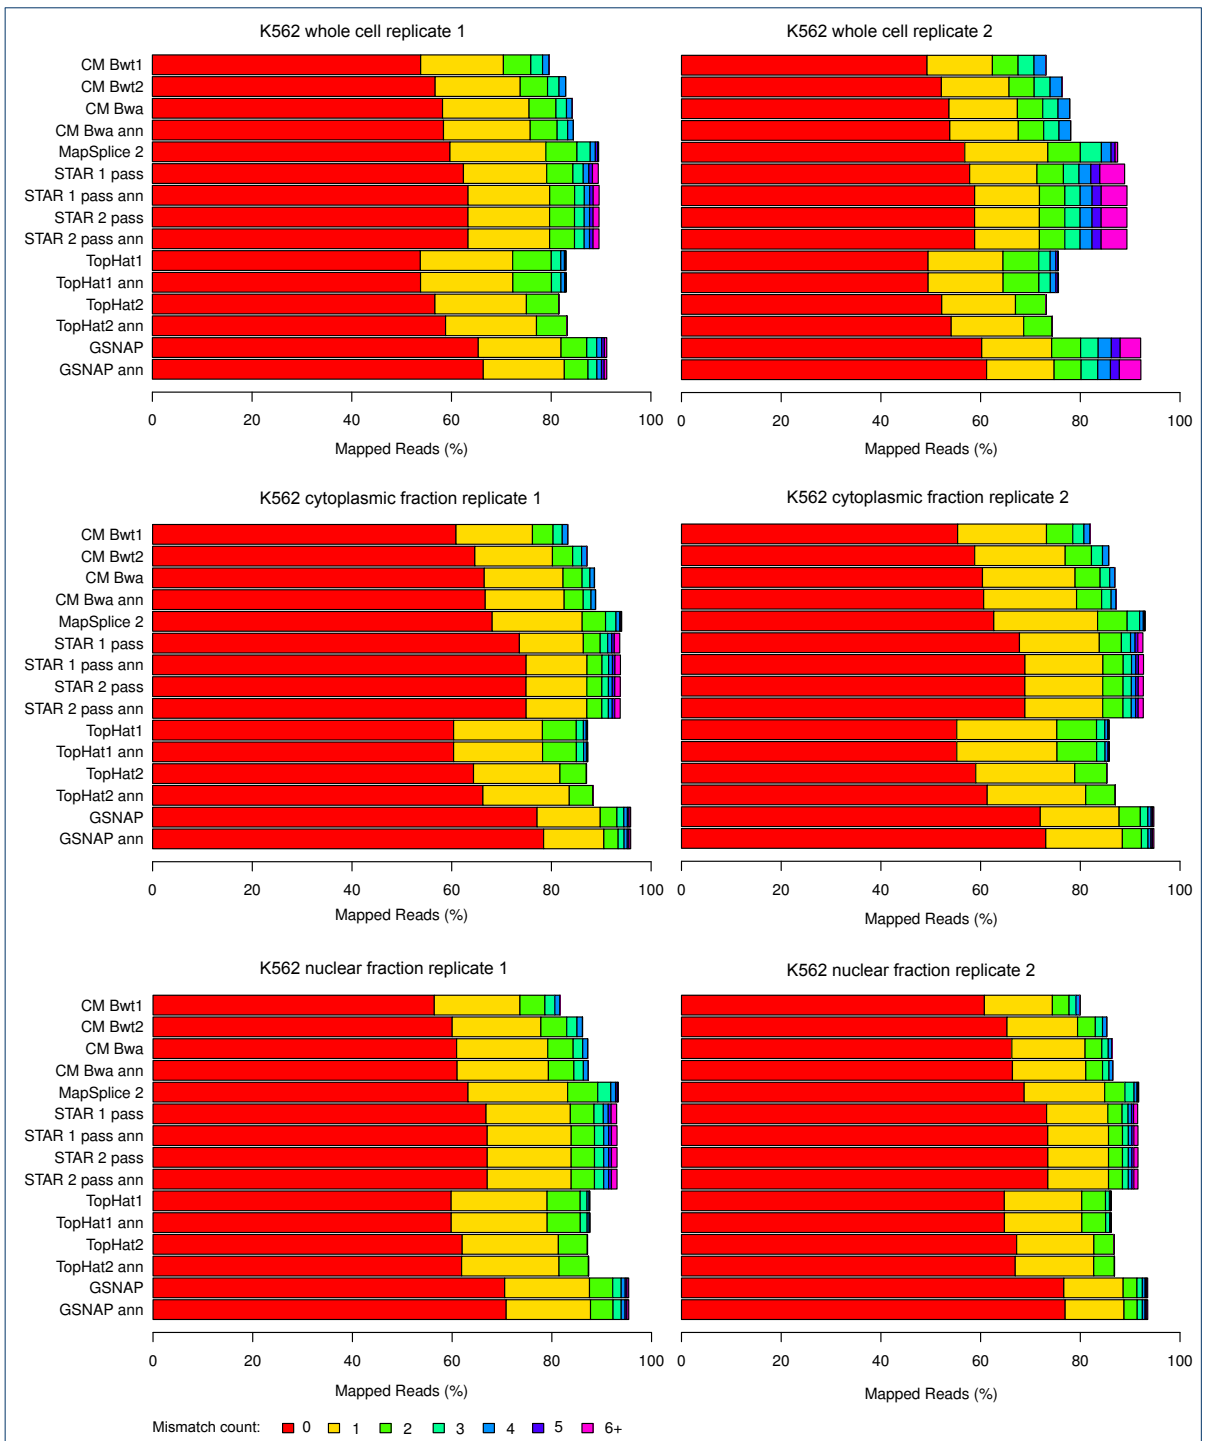

**Supplementary Figure 4** Percentage of mapped reads and mismatch distribution for the mapped reads for all evaluated real-life data sets.

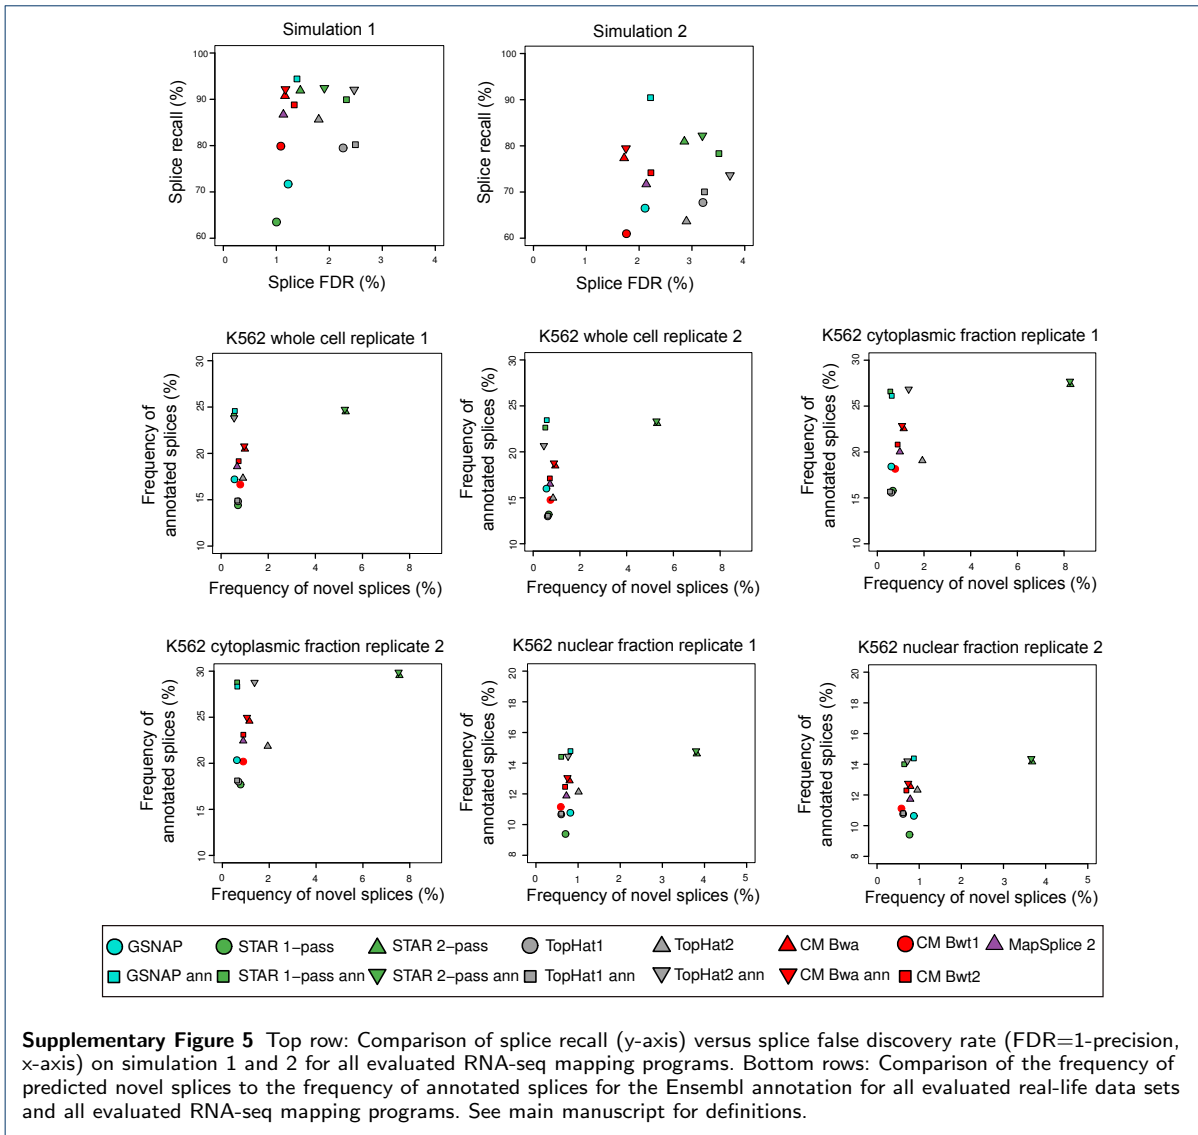

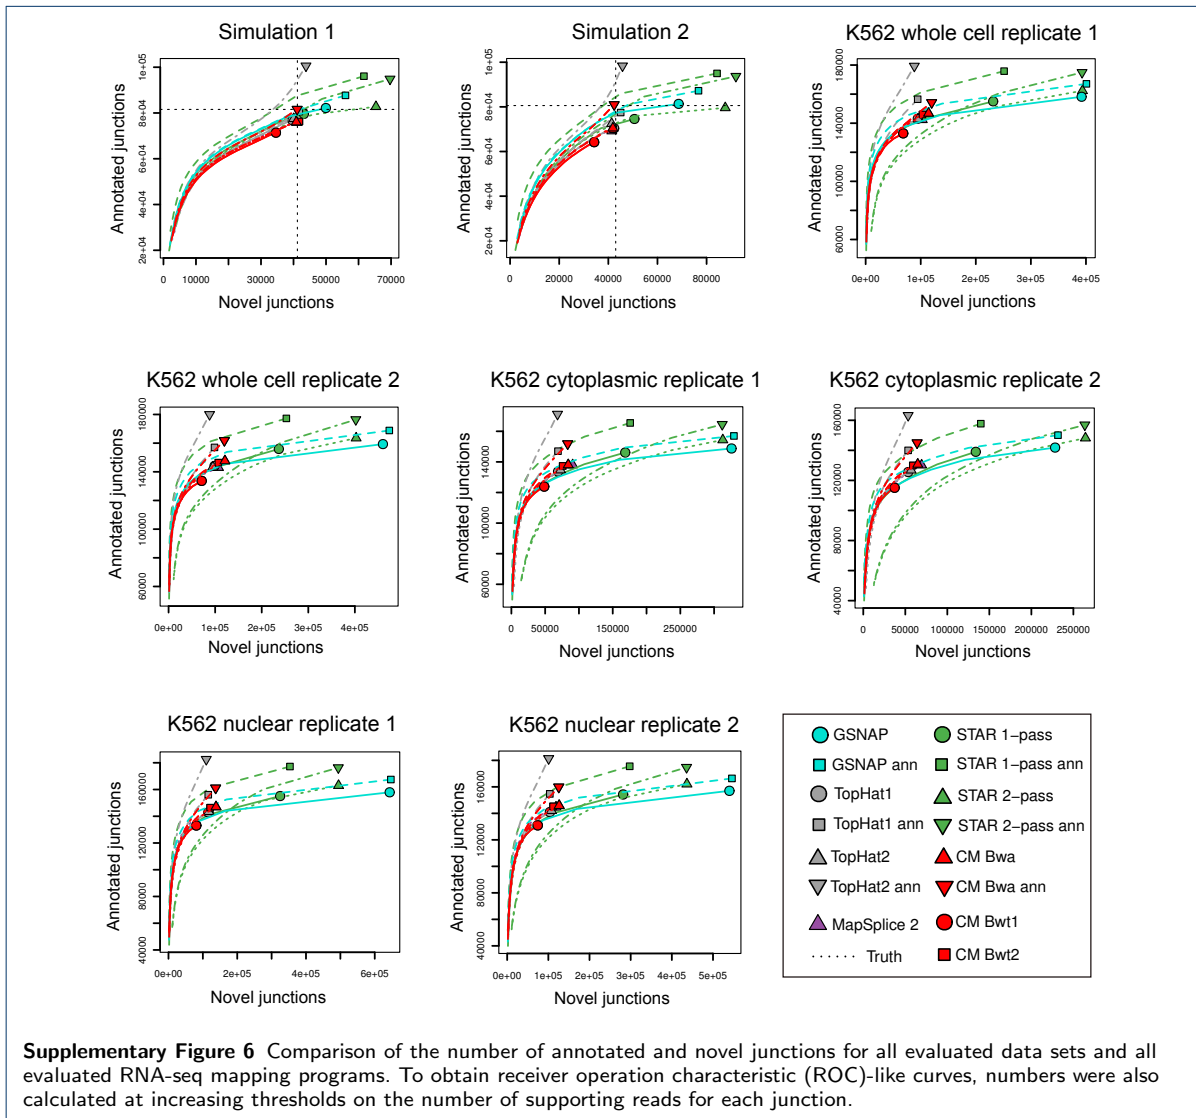

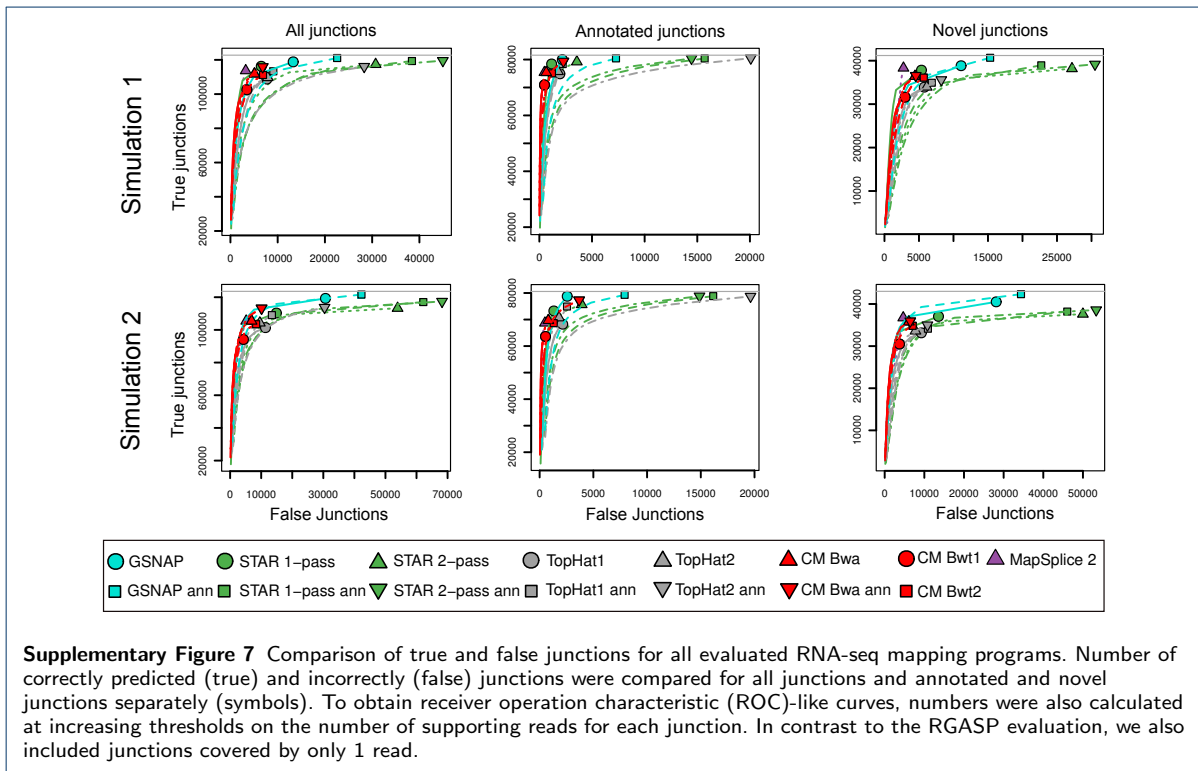



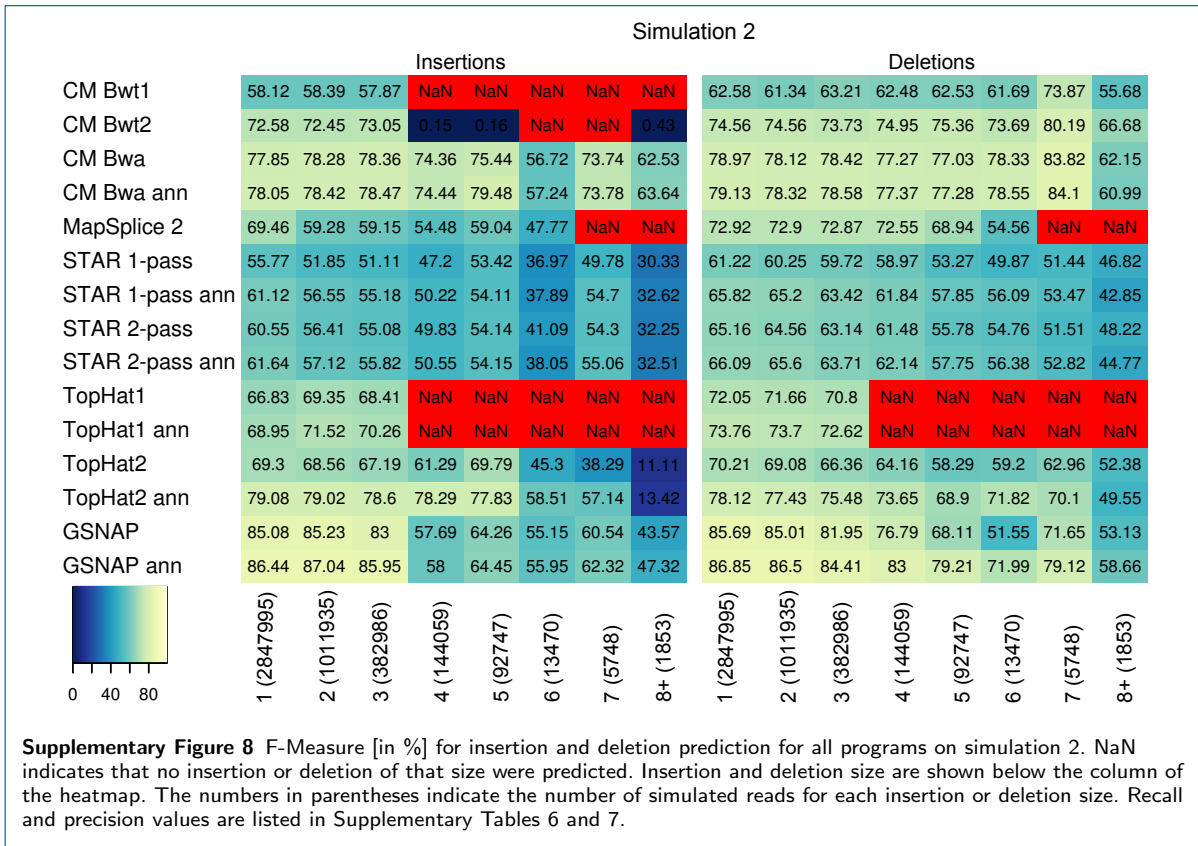

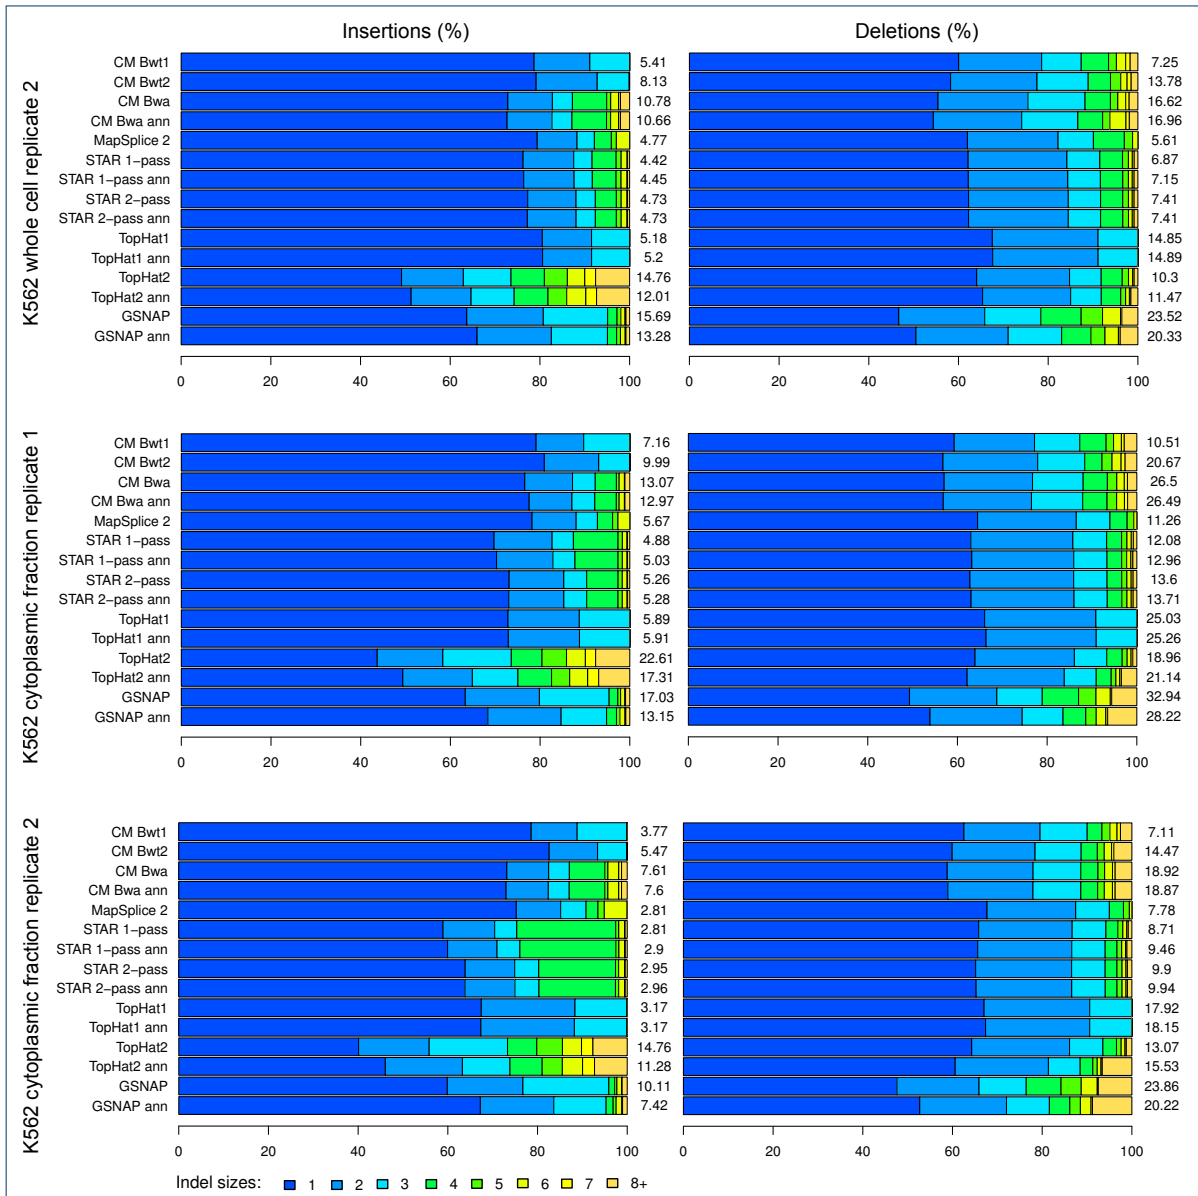

**Supplementary Figure 9** Fraction of mapped reads with different indel sizes among all reads with indels for the second replicate of the K562 whole cell sample and both replicates of the K562 cytoplasmic fraction sample. Numbers next to the barplots indicate the number of mapped reads with indels divided by  $10^5$  (i.e. number of reads per 100,000).

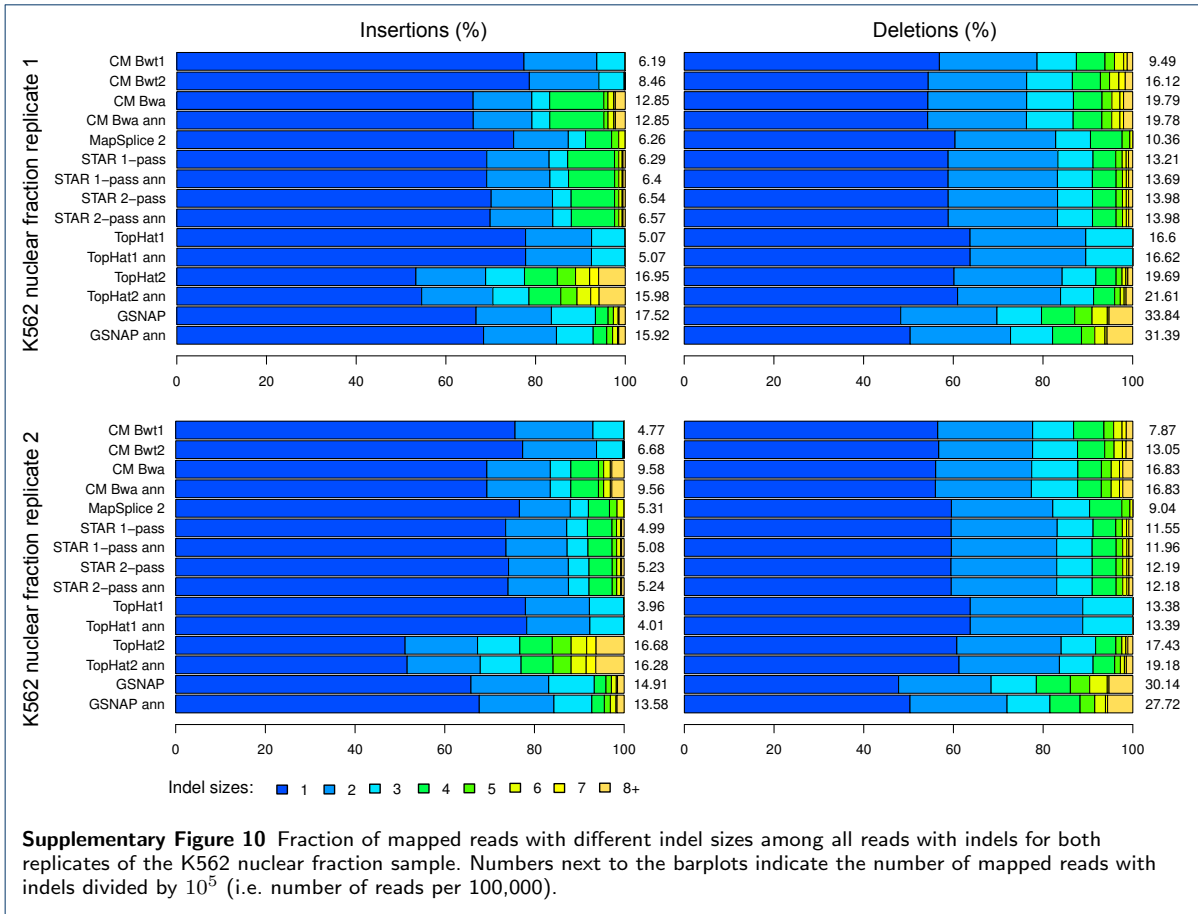

## Supplementary Tables

| Dataset                               | ID       | # Sequenced fragments | # Reads   |
|---------------------------------------|----------|-----------------------|-----------|
| Simulation 1                          | NA       | 40000000              | 80000000  |
| Simulation 2                          | NA       | 40000000              | 80000000  |
| K562 whole cell replicate 1           | LID16627 | 113588758             | 227177516 |
| K562 whole cell replicate 2           | LID16628 | 119053315             | 238106630 |
| K562 cytoplasmic fraction replicate 1 | LID8465  | 124826068             | 249652136 |
| K562 cytoplasmic fraction replicate 2 | LID8466  | 88445339              | 176890678 |
| K562 nuclear fraction replicate 1     | LID8556  | 117113622             | 234227244 |
| K562 nuclear fraction replicate 2     | LID8557  | 105769104             | 211538208 |

**Supplementary Table 1** Data sets used for evaluation and number of sequenced fragments and reads for each data set.

| Program                      | Uniquely mapped reads |                        |                       |                        |                          | All reads (primary alignments only) |                        |                       |                        |                          |
|------------------------------|-----------------------|------------------------|-----------------------|------------------------|--------------------------|-------------------------------------|------------------------|-----------------------|------------------------|--------------------------|
|                              | Overall mapped reads  | Perfectly mapped reads | Part correctly mapped | Correctly mapped bases | Incorrectly mapped bases | Overall mapped reads                | Perfectly mapped reads | Part correctly mapped | Correctly mapped bases | Incorrectly mapped bases |
| <b>A Simulation 1</b>        |                       |                        |                       |                        |                          |                                     |                        |                       |                        |                          |
| <b>All Reads</b>             |                       |                        |                       |                        |                          |                                     |                        |                       |                        |                          |
| CM Bwt1                      | 89.28                 | 87.82                  | 0.60                  | 88.38                  | 0.90                     | 89.28                               | 87.82                  | 0.60                  | 88.38                  | 0.90                     |
| CM Bwt2 ( $k = 3$ , default) | 95.12                 | 93.44                  | 0.57                  | 93.97                  | 1.15                     | 95.12                               | 93.44                  | 0.57                  | 93.97                  | 1.15                     |
| CM Bwt2 ( $k = 10$ )         | 95.78                 | 94.45                  | 0.58                  | 95.00                  | 0.78                     | 95.78                               | 94.45                  | 0.58                  | 95.00                  | 0.78                     |
| CM Bwa                       | 95.99                 | 94.68                  | 0.55                  | 95.20                  | 0.79                     | 95.99                               | 94.68                  | 0.55                  | 95.20                  | 0.79                     |
| CM Bwa ann                   | 96.24                 | 94.95                  | 0.54                  | 95.46                  | 0.78                     | 96.24                               | 94.95                  | 0.54                  | 95.46                  | 0.78                     |
| MapSplice 2                  | 96.54                 | 93.47                  | 2.49                  | 95.52                  | 0.61                     | 98.89                               | 94.78                  | 2.52                  | 96.86                  | 1.61                     |
| STAR 1-pass                  | 96.14                 | 84.61                  | 11.20                 | 94.87                  | 0.47                     | 98.72                               | 85.81                  | 11.35                 | 96.20                  | 1.70                     |
| STAR 1-pass ann              | 95.56                 | 88.83                  | 6.60                  | 95.06                  | 0.16                     | 98.81                               | 90.64                  | 6.94                  | 97.19                  | 1.27                     |
| STAR 2-pass                  | 95.48                 | 89.11                  | 6.24                  | 95.01                  | 0.16                     | 98.82                               | 91.05                  | 6.57                  | 97.26                  | 1.23                     |
| STAR 2-pass ann              | 95.29                 | 89.00                  | 6.16                  | 94.84                  | 0.15                     | 98.81                               | 91.08                  | 6.52                  | 97.26                  | 1.25                     |
| TopHat1                      | 93.37                 | 90.12                  | 1.96                  | 92.00                  | 1.37                     | 95.23                               | 90.87                  | 2.00                  | 92.79                  | 2.44                     |
| TopHat1 ann                  | 93.51                 | 90.21                  | 2.00                  | 92.13                  | 1.37                     | 95.39                               | 90.97                  | 2.05                  | 92.94                  | 2.45                     |
| TopHat2                      | 91.38                 | 90.41                  | 0.46                  | 90.84                  | 0.54                     | 93.81                               | 91.45                  | 0.56                  | 91.96                  | 1.85                     |
| TopHat2 ann                  | 92.00                 | 91.35                  | 0.36                  | 91.69                  | 0.31                     | 94.62                               | 92.64                  | 0.54                  | 93.16                  | 1.46                     |
| GSNAP                        | 95.65                 | 82.99                  | 12.39                 | 94.68                  | 0.37                     | 99.23                               | 84.90                  | 12.66                 | 96.84                  | 1.75                     |
| GSNAP ann                    | 95.72                 | 87.04                  | 8.62                  | 95.30                  | 0.07                     | 99.24                               | 89.07                  | 8.82                  | 97.52                  | 1.35                     |
| <b>B Simulation 2</b>        |                       |                        |                       |                        |                          |                                     |                        |                       |                        |                          |
| <b>All Reads</b>             |                       |                        |                       |                        |                          |                                     |                        |                       |                        |                          |
| CM Bwt1                      | 80.59                 | 78.74                  | 0.95                  | 79.64                  | 0.95                     | 80.59                               | 78.74                  | 0.95                  | 79.64                  | 0.95                     |
| CM Bwt2 ( $k = 3$ , default) | 86.38                 | 84.08                  | 0.98                  | 85.01                  | 1.37                     | 86.38                               | 84.08                  | 0.98                  | 85.01                  | 1.37                     |
| CM Bwt2 ( $k = 10$ )         | 87.39                 | 85.30                  | 1.00                  | 86.25                  | 1.13                     | 87.39                               | 85.30                  | 1.00                  | 86.25                  | 1.13                     |
| CM Bwa                       | 87.91                 | 86.20                  | 0.92                  | 87.07                  | 0.84                     | 87.91                               | 86.20                  | 0.92                  | 87.07                  | 0.84                     |
| CM Bwa ann                   | 88.28                 | 86.58                  | 0.91                  | 87.44                  | 0.83                     | 88.28                               | 86.58                  | 0.91                  | 87.44                  | 0.83                     |
| MapSplice 2                  | 93.53                 | 85.58                  | 7.03                  | 90.77                  | 0.94                     | 95.93                               | 86.97                  | 7.13                  | 92.23                  | 1.84                     |
| STAR 1-pass                  | 93.36                 | 72.55                  | 20.39                 | 90.75                  | 0.62                     | 96.23                               | 73.72                  | 20.74                 | 92.21                  | 1.96                     |
| STAR 1-pass ann              | 93.33                 | 76.53                  | 16.55                 | 91.66                  | 0.36                     | 96.71                               | 78.10                  | 17.11                 | 93.73                  | 1.60                     |
| STAR 2-pass                  | 93.24                 | 76.80                  | 16.14                 | 91.58                  | 0.39                     | 96.77                               | 78.54                  | 16.74                 | 93.85                  | 1.58                     |
| STAR 2-pass ann              | 93.08                 | 76.85                  | 15.98                 | 91.51                  | 0.35                     | 96.77                               | 78.67                  | 16.61                 | 93.90                  | 1.59                     |
| TopHat1                      | 83.98                 | 80.94                  | 2.04                  | 82.90                  | 1.08                     | 86.09                               | 81.76                  | 2.14                  | 83.82                  | 2.27                     |
| TopHat1 ann                  | 84.40                 | 81.32                  | 2.08                  | 83.32                  | 1.07                     | 86.53                               | 82.16                  | 2.19                  | 84.26                  | 2.27                     |
| TopHat2                      | 75.53                 | 74.31                  | 0.87                  | 75.13                  | 0.40                     | 77.92                               | 75.29                  | 0.97                  | 76.18                  | 1.74                     |
| TopHat2 ann                  | 77.05                 | 75.94                  | 0.83                  | 76.73                  | 0.32                     | 79.65                               | 77.14                  | 1.02                  | 78.10                  | 1.55                     |
| GSNAP                        | 94.28                 | 70.94                  | 22.95                 | 92.48                  | 0.47                     | 97.95                               | 72.54                  | 23.45                 | 94.55                  | 2.01                     |
| GSNAP ann                    | 94.31                 | 74.66                  | 19.48                 | 93.17                  | 0.19                     | 97.97                               | 76.35                  | 19.91                 | 95.27                  | 1.70                     |

**Supplementary Table 2** Fraction [in %] of overall mapped reads, perfectly mapped reads, part correctly mapped reads (of all simulated reads) as well as fraction of correctly and incorrectly mapped bases (of all bases in all simulated reads) on both simulated data sets. Results are shown separately for uniquely mapped reads and all mapped reads. In the latter case, only the primary alignment was evaluated. "CM Bwt1", "CM Bwt2", "CM Bwa" denote ContextMap 2 used with Bowtie, Bowtie 2, and BWA as underlying alignment program, respectively. ContextMap 2 with Bowtie 2 was run with the maximum number of alignments reported per read ( $k$ ) set to 3 (default setting used for evaluating mapping quality) and 10, respectively. If a gene annotation was provided, "ann" was added to the name of the respective program.

| Program                      | Uniquely mapped reads |                        |                       |                        |                          | All reads (primary alignments only) |                        |                       |                        |                          |
|------------------------------|-----------------------|------------------------|-----------------------|------------------------|--------------------------|-------------------------------------|------------------------|-----------------------|------------------------|--------------------------|
|                              | Overall mapped reads  | Perfectly mapped reads | Part correctly mapped | Correctly mapped bases | Incorrectly mapped bases | Overall mapped reads                | Perfectly mapped reads | Part correctly mapped | Correctly mapped bases | Incorrectly mapped bases |
| <b>A Simulation 1</b>        |                       |                        |                       |                        |                          |                                     |                        |                       |                        |                          |
| <b>Unspliced Reads</b>       |                       |                        |                       |                        |                          |                                     |                        |                       |                        |                          |
| CM Bwt1                      | 89.99                 | 89.19                  | 0.11                  | 89.29                  | 0.70                     | 89.99                               | 89.19                  | 0.11                  | 89.29                  | 0.70                     |
| CM Bwt2 ( $k = 3$ , default) | 95.65                 | 94.49                  | 0.11                  | 94.58                  | 1.07                     | 95.65                               | 94.49                  | 0.11                  | 94.58                  | 1.07                     |
| CM Bwt2 ( $k = 10$ )         | 96.26                 | 95.37                  | 0.13                  | 95.48                  | 0.78                     | 96.26                               | 95.37                  | 0.13                  | 95.48                  | 0.78                     |
| CM Bwa                       | 96.45                 | 95.59                  | 0.12                  | 95.69                  | 0.76                     | 96.45                               | 95.59                  | 0.12                  | 95.69                  | 0.76                     |
| CM Bwa ann                   | 96.48                 | 95.59                  | 0.15                  | 95.72                  | 0.75                     | 96.48                               | 95.59                  | 0.15                  | 95.72                  | 0.75                     |
| MapSplice 2                  | 96.32                 | 95.28                  | 0.74                  | 95.81                  | 0.30                     | 99.05                               | 96.86                  | 0.75                  | 97.40                  | 1.43                     |
| STAR 1-pass                  | 96.01                 | 90.69                  | 5.17                  | 95.68                  | 0.15                     | 98.70                               | 92.04                  | 5.25                  | 97.10                  | 1.41                     |
| STAR 1-pass ann              | 95.76                 | 90.43                  | 5.22                  | 95.46                  | 0.12                     | 98.73                               | 92.08                  | 5.33                  | 97.21                  | 1.32                     |
| STAR 2-pass                  | 95.73                 | 90.42                  | 5.21                  | 95.45                  | 0.10                     | 98.73                               | 92.11                  | 5.33                  | 97.24                  | 1.30                     |
| STAR 2-pass ann              | 95.65                 | 90.29                  | 5.24                  | 95.34                  | 0.12                     | 98.73                               | 92.04                  | 5.37                  | 97.21                  | 1.33                     |
| TopHat1                      | 93.76                 | 92.87                  | 0.13                  | 93.00                  | 0.77                     | 95.77                               | 93.70                  | 0.14                  | 93.83                  | 1.94                     |
| TopHat1 ann                  | 93.76                 | 92.86                  | 0.13                  | 92.99                  | 0.77                     | 95.77                               | 93.70                  | 0.14                  | 93.83                  | 1.94                     |
| TopHat2                      | 92.20                 | 91.78                  | 0.14                  | 91.92                  | 0.29                     | 94.73                               | 92.89                  | 0.15                  | 93.03                  | 1.70                     |
| TopHat2 ann                  | 92.19                 | 91.67                  | 0.19                  | 91.85                  | 0.34                     | 94.65                               | 92.85                  | 0.25                  | 93.08                  | 1.57                     |
| GSNAP                        | 95.46                 | 87.50                  | 7.85                  | 95.03                  | 0.11                     | 99.21                               | 89.64                  | 8.03                  | 97.35                  | 1.52                     |
| GSNAP ann                    | 95.45                 | 87.51                  | 7.89                  | 95.08                  | 0.05                     | 99.21                               | 89.68                  | 8.09                  | 97.44                  | 1.42                     |
| <b>B Simulation 2</b>        |                       |                        |                       |                        |                          |                                     |                        |                       |                        |                          |
| <b>Unspliced Reads</b>       |                       |                        |                       |                        |                          |                                     |                        |                       |                        |                          |
| CM Bwt1                      | 83.86                 | 82.70                  | 0.38                  | 83.06                  | 0.80                     | 83.86                               | 82.70                  | 0.38                  | 83.06                  | 0.80                     |
| CM Bwt2 ( $k = 3$ , default) | 88.16                 | 86.48                  | 0.40                  | 86.86                  | 1.30                     | 88.16                               | 86.48                  | 0.40                  | 86.86                  | 1.30                     |
| CM Bwt2 ( $k = 10$ )         | 89.25                 | 87.72                  | 0.41                  | 88.10                  | 1.15                     | 89.25                               | 87.72                  | 0.41                  | 88.10                  | 1.15                     |
| CM Bwa                       | 89.50                 | 88.36                  | 0.39                  | 88.72                  | 0.78                     | 89.50                               | 88.36                  | 0.39                  | 88.72                  | 0.78                     |
| CM Bwa ann                   | 89.53                 | 88.37                  | 0.41                  | 88.75                  | 0.78                     | 89.53                               | 88.37                  | 0.41                  | 88.75                  | 0.78                     |
| MapSplice 2                  | 94.19                 | 89.61                  | 4.06                  | 92.49                  | 0.52                     | 97.01                               | 91.31                  | 4.13                  | 94.25                  | 1.54                     |
| STAR 1-pass                  | 93.74                 | 79.84                  | 13.68                 | 92.64                  | 0.26                     | 96.65                               | 81.13                  | 13.90                 | 94.14                  | 1.64                     |
| STAR 1-pass ann              | 93.66                 | 79.71                  | 13.74                 | 92.55                  | 0.25                     | 96.77                               | 81.20                  | 14.02                 | 94.30                  | 1.58                     |
| STAR 2-pass                  | 93.56                 | 79.59                  | 13.76                 | 92.45                  | 0.26                     | 96.79                               | 81.18                  | 14.07                 | 94.33                  | 1.57                     |
| STAR 2-pass ann              | 93.51                 | 79.52                  | 13.77                 | 92.39                  | 0.26                     | 96.79                               | 81.14                  | 14.09                 | 94.31                  | 1.59                     |
| TopHat1                      | 85.55                 | 84.41                  | 0.59                  | 84.97                  | 0.58                     | 87.77                               | 85.29                  | 0.63                  | 85.89                  | 1.88                     |
| TopHat1 ann                  | 85.56                 | 84.41                  | 0.59                  | 84.98                  | 0.58                     | 87.78                               | 85.29                  | 0.63                  | 85.90                  | 1.87                     |
| TopHat2                      | 77.90                 | 77.20                  | 0.51                  | 77.69                  | 0.21                     | 80.44                               | 78.25                  | 0.54                  | 78.76                  | 1.68                     |
| TopHat2 ann                  | 78.01                 | 77.15                  | 0.55                  | 77.68                  | 0.33                     | 80.41                               | 78.22                  | 0.62                  | 78.80                  | 1.61                     |
| GSNAP                        | 94.29                 | 75.62                  | 18.47                 | 93.21                  | 0.18                     | 98.10                               | 77.39                  | 18.89                 | 95.38                  | 1.77                     |
| GSNAP ann                    | 94.28                 | 75.64                  | 18.50                 | 93.26                  | 0.13                     | 98.10                               | 77.42                  | 18.93                 | 95.44                  | 1.71                     |

**Supplementary Table 3** Fraction [in %] of overall mapped reads, perfectly mapped reads, part correctly mapped reads (of all simulated *unspliced* reads) as well as fraction of correctly and incorrectly mapped bases (of all bases in all simulated *unspliced* reads) on both simulated data sets. Results are shown separately for uniquely mapped reads and all mapped reads. In the latter case, only the primary alignment was evaluated. "CM Bwt1", "CM Bwt2", "CM Bwa" denote ContextMap 2 used with Bowtie, Bowtie 2, and BWA as underlying alignment program, respectively. ContextMap 2 with Bowtie 2 was run with the maximum number of alignments reported per read ( $k$ ) set to 3 (default setting used for evaluating mapping quality) and 10, respectively. If a gene annotation was provided, "ann" was added to the name of the respective program.

| Program                      | Uniquely mapped reads |                        |                       |                        |                          | All reads (primary alignments only) |                        |                       |                        |                          |
|------------------------------|-----------------------|------------------------|-----------------------|------------------------|--------------------------|-------------------------------------|------------------------|-----------------------|------------------------|--------------------------|
|                              | Overall mapped reads  | Perfectly mapped reads | Part correctly mapped | Correctly mapped bases | Incorrectly mapped bases | Overall mapped reads                | Perfectly mapped reads | Part correctly mapped | Correctly mapped bases | Incorrectly mapped bases |
| <b>A Simulation 1</b>        |                       |                        |                       |                        |                          |                                     |                        |                       |                        |                          |
| <b>Spliced Reads</b>         |                       |                        |                       |                        |                          |                                     |                        |                       |                        |                          |
| CM Bwt1                      | 86.40                 | 82.22                  | 2.58                  | 84.69                  | 1.71                     | 86.40                               | 82.22                  | 2.58                  | 84.69                  | 1.71                     |
| CM Bwt2 ( $k = 3$ , default) | 92.96                 | 89.13                  | 2.43                  | 91.45                  | 1.51                     | 92.96                               | 89.13                  | 2.43                  | 91.45                  | 1.51                     |
| CM Bwt2 ( $k = 10$ )         | 93.82                 | 90.71                  | 2.44                  | 93.04                  | 0.78                     | 93.82                               | 90.71                  | 2.44                  | 93.04                  | 0.78                     |
| CM Bwa                       | 94.09                 | 90.99                  | 2.28                  | 93.17                  | 0.92                     | 94.09                               | 90.99                  | 2.28                  | 93.17                  | 0.92                     |
| CM Bwa ann                   | 95.27                 | 92.32                  | 2.13                  | 94.38                  | 0.89                     | 95.27                               | 92.32                  | 2.13                  | 94.38                  | 0.89                     |
| MapSplice 2                  | 97.42                 | 86.04                  | 9.68                  | 94.36                  | 1.88                     | 98.23                               | 86.27                  | 9.77                  | 94.66                  | 2.37                     |
| STAR 1-pass                  | 96.68                 | 59.73                  | 35.86                 | 91.57                  | 1.79                     | 98.81                               | 60.31                  | 36.32                 | 92.53                  | 2.88                     |
| STAR 1-pass ann              | 94.73                 | 82.28                  | 12.26                 | 93.43                  | 0.35                     | 99.14                               | 84.77                  | 13.53                 | 97.11                  | 1.03                     |
| STAR 2-pass                  | 94.46                 | 83.70                  | 10.47                 | 93.22                  | 0.41                     | 99.18                               | 86.72                  | 11.66                 | 97.34                  | 0.95                     |
| STAR 2-pass ann              | 93.82                 | 83.73                  | 9.90                  | 92.80                  | 0.29                     | 99.16                               | 87.13                  | 11.23                 | 97.46                  | 0.93                     |
| TopHat1                      | 91.77                 | 78.88                  | 9.43                  | 87.93                  | 3.84                     | 93.03                               | 79.29                  | 9.64                  | 88.53                  | 4.50                     |
| TopHat1 ann                  | 92.48                 | 79.36                  | 9.66                  | 88.63                  | 3.85                     | 93.81                               | 79.82                  | 9.89                  | 89.30                  | 4.51                     |
| TopHat2                      | 88.01                 | 84.78                  | 1.78                  | 86.42                  | 1.59                     | 90.02                               | 85.57                  | 2.23                  | 87.56                  | 2.46                     |
| TopHat2 ann                  | 91.24                 | 90.04                  | 1.08                  | 91.06                  | 0.18                     | 94.51                               | 91.82                  | 1.75                  | 93.47                  | 1.04                     |
| GSNAP                        | 96.44                 | 64.51                  | 31.00                 | 93.21                  | 1.44                     | 99.31                               | 65.51                  | 31.61                 | 94.78                  | 2.68                     |
| GSNAP ann                    | 96.82                 | 85.14                  | 11.58                 | 96.20                  | 0.18                     | 99.36                               | 86.57                  | 11.81                 | 97.84                  | 1.07                     |
| <b>B Simulation 2</b>        |                       |                        |                       |                        |                          |                                     |                        |                       |                        |                          |
| <b>Spliced Reads</b>         |                       |                        |                       |                        |                          |                                     |                        |                       |                        |                          |
| CM Bwt1                      | 67.13                 | 62.39                  | 3.31                  | 65.56                  | 1.57                     | 67.13                               | 62.39                  | 3.31                  | 65.56                  | 1.57                     |
| CM Bwt2 ( $k = 3$ , default) | 79.05                 | 74.17                  | 3.38                  | 77.39                  | 1.65                     | 79.05                               | 74.17                  | 3.38                  | 77.39                  | 1.65                     |
| CM Bwt2 ( $k = 10$ )         | 79.70                 | 75.35                  | 3.42                  | 78.61                  | 1.09                     | 79.70                               | 75.35                  | 3.42                  | 78.61                  | 1.09                     |
| CM Bwa                       | 81.33                 | 77.29                  | 3.11                  | 80.27                  | 1.06                     | 81.33                               | 77.29                  | 3.11                  | 80.27                  | 1.06                     |
| CM Bwa ann                   | 83.11                 | 79.19                  | 2.97                  | 82.05                  | 1.05                     | 83.11                               | 79.19                  | 2.97                  | 82.05                  | 1.05                     |
| MapSplice 2                  | 90.80                 | 68.99                  | 19.29                 | 83.68                  | 2.67                     | 91.47                               | 69.07                  | 19.48                 | 83.91                  | 3.05                     |
| STAR 1-pass                  | 91.80                 | 42.50                  | 48.05                 | 82.96                  | 2.14                     | 94.50                               | 43.11                  | 48.93                 | 84.26                  | 3.30                     |
| STAR 1-pass ann              | 91.98                 | 63.42                  | 28.13                 | 87.96                  | 0.80                     | 96.47                               | 65.30                  | 29.87                 | 91.37                  | 1.69                     |
| STAR 2-pass                  | 91.89                 | 65.27                  | 25.99                 | 87.96                  | 0.95                     | 96.70                               | 67.61                  | 27.80                 | 91.90                  | 1.62                     |
| STAR 2-pass ann              | 91.34                 | 65.81                  | 25.10                 | 87.89                  | 0.73                     | 96.71                               | 68.46                  | 26.98                 | 92.22                  | 1.59                     |
| TopHat1                      | 77.46                 | 66.62                  | 8.04                  | 74.35                  | 3.11                     | 79.17                               | 67.23                  | 8.38                  | 75.26                  | 3.91                     |
| TopHat1 ann                  | 79.59                 | 68.59                  | 8.23                  | 76.49                  | 3.10                     | 81.39                               | 69.26                  | 8.60                  | 77.50                  | 3.90                     |
| TopHat2                      | 65.76                 | 62.38                  | 2.35                  | 64.57                  | 1.19                     | 67.56                               | 63.07                  | 2.73                  | 65.54                  | 2.02                     |
| TopHat2 ann                  | 73.10                 | 70.93                  | 1.99                  | 72.81                  | 0.29                     | 76.50                               | 72.68                  | 2.67                  | 75.18                  | 1.32                     |
| GSNAP                        | 94.22                 | 51.61                  | 41.43                 | 89.48                  | 1.66                     | 97.36                               | 52.53                  | 42.26                 | 91.15                  | 3.02                     |
| GSNAP ann                    | 94.43                 | 70.60                  | 23.51                 | 92.82                  | 0.44                     | 97.45                               | 71.93                  | 23.97                 | 94.59                  | 1.65                     |

**Supplementary Table 4** Fraction [in %] of overall mapped reads, perfectly mapped reads, part correctly mapped reads (of all simulated *spliced* reads) as well as fraction of correctly and incorrectly mapped bases (of all bases in all simulated *spliced* reads) on both simulated data sets. Results are shown separately for uniquely mapped reads and all mapped reads. In the latter case, only the primary alignment was evaluated. "CM Bwt1", "CM Bwt2", "CM Bwa" denote ContextMap 2 used with Bowtie, Bowtie 2, and BWA as underlying alignment program, respectively. ContextMap 2 with Bowtie 2 was run with the maximum number of alignments reported per read ( $k$ ) set to 3 (default setting used for evaluating mapping quality) and 10, respectively. If a gene annotation was provided, "ann" was added to the name of the respective program.

| Program               | Recall for simulated reads spanning different numbers of junctions |            |           |             |           | Precision for simulated reads spanning different numbers of junctions |       |       |       |       |
|-----------------------|--------------------------------------------------------------------|------------|-----------|-------------|-----------|-----------------------------------------------------------------------|-------|-------|-------|-------|
|                       | 1 (13808336)                                                       | 2 (598297) | 3 (11781) | 2*(548382)  | 3*(6908)  | 1                                                                     | 2     | 3     | 2*    | 3*    |
| <b>A Simulation 1</b> |                                                                    |            |           |             |           |                                                                       |       |       |       |       |
| CM Bwt1               | 85.64                                                              | 7.72       | 0.0       | 8.26        | 0.0       | 98.15                                                                 | 92.09 | -     | 92.14 | -     |
| CM Bwt2               | 90.3                                                               | 65.87      | 33.6      | 71.56       | 57.3      | 98.07                                                                 | 97.04 | 99.3  | 97.03 | 99.3  |
| CM Bwa                | 91.94                                                              | 72.05      | 36.44     | 78.27       | 62.13     | 98.34                                                                 | 97.12 | 99.4  | 97.09 | 99.37 |
| CM Bwa ann            | 93.27                                                              | 74.89      | 37.07     | 81.19       | 62.97     | 98.35                                                                 | 97.34 | 98.76 | 97.18 | 98.37 |
| MapSplice 2           | 87.62                                                              | 66.53      | 15.89     | 68.58       | 1.75      | 97.78                                                                 | 97.78 | 96.15 | 97.88 | 98.37 |
| STAR 1-pass           | 65.28                                                              | 18.47      | 2.58      | 19.18       | 0.75      | 95.74                                                                 | 94.68 | 87.86 | 94.89 | 94.55 |
| STAR 1-pass ann       | 90.54                                                              | 71.62      | 65.19     | 73.06       | 72.05     | 96.77                                                                 | 94.95 | 90.29 | 94.93 | 95.6  |
| STAR 2-pass           | 92.41                                                              | 76.57      | 71.54     | 78.23       | 78.58     | 97.74                                                                 | 96.91 | 96.23 | 96.94 | 98.19 |
| STAR 2-pass ann       | 92.88                                                              | 78.15      | 73.25     | 79.49       | 78.42     | 97.36                                                                 | 96.28 | 94.57 | 96.12 | 96.41 |
| TopHat1               | 79.94                                                              | 67.5       | 49.45     | 72.01       | 66.24     | 97.44                                                                 | 91.0  | 88.99 | 91.05 | 87.92 |
| TopHat1 ann           | 80.41                                                              | 70.21      | 55.28     | 73.63       | 67.49     | 97.23                                                                 | 90.27 | 88.77 | 90.16 | 87.22 |
| TopHat2               | 86.13                                                              | 78.64      | 63.27     | 83.07       | 80.2      | 98.06                                                                 | 97.35 | 98.07 | 97.39 | 98.75 |
| TopHat2 ann           | 92.27                                                              | 87.42      | 80.47     | 89.59       | 88.26     | 97.55                                                                 | 94.44 | 92.16 | 94.65 | 92.55 |
| GSNAP                 | 73.31                                                              | 28.39      | 10.86     | 27.27       | 6.56      | 95.99                                                                 | 92.54 | 63.04 | 94.66 | 98.26 |
| GSNAP ann             | 94.87                                                              | 82.17      | 68.42     | 83.78       | 74.22     | 98.12                                                                 | 96.09 | 94.88 | 96.9  | 98.54 |
| <b>B Simulation 2</b> |                                                                    |            |           |             |           |                                                                       |       |       |       |       |
|                       | 1 (14962090)                                                       | 2 (622980) | 3 (11701) | 2* (509939) | 3* (5602) | 1                                                                     | 2     | 3     | 2*    | 3*    |
| CM Bwt1               | 65.27                                                              | 5.0        | 0.0       | 5.94        | 0.0       | 97.54                                                                 | 89.21 | -     | 89.16 | -     |
| CM Bwt2               | 75.74                                                              | 50.33      | 19.63     | 60.99       | 41.0      | 97.17                                                                 | 95.92 | 99.39 | 95.51 | 99.39 |
| CM Bwa                | 78.63                                                              | 57.26      | 20.96     | 69.35       | 43.75     | 97.77                                                                 | 96.28 | 98.71 | 95.79 | 98.63 |
| CM Bwa ann            | 80.73                                                              | 59.85      | 21.49     | 72.08       | 44.59     | 97.75                                                                 | 96.59 | 99.02 | 95.66 | 98.39 |
| MapSplice 2           | 72.71                                                              | 45.76      | 12.89     | 51.51       | 0.71      | 96.33                                                                 | 94.97 | 97.42 | 94.83 | 97.56 |
| STAR 1-pass           | 51.7                                                               | 11.13      | 0.63      | 12.73       | 0.34      | 94.78                                                                 | 93.35 | 89.16 | 92.83 | 70.37 |
| STAR 1-pass ann       | 79.05                                                              | 53.75      | 44.14     | 55.96       | 50.34     | 95.13                                                                 | 90.88 | 90.23 | 89.59 | 93.28 |
| STAR 2-pass           | 81.47                                                              | 59.59      | 47.77     | 63.35       | 56.19     | 95.87                                                                 | 92.55 | 92.05 | 91.45 | 94.11 |
| STAR 2-pass ann       | 82.74                                                              | 61.49      | 48.43     | 64.08       | 56.16     | 95.67                                                                 | 91.54 | 89.06 | 90.12 | 92.15 |
| TopHat1               | 68.33                                                              | 55.08      | 33.33     | 65.21       | 61.53     | 96.57                                                                 | 89.63 | 87.96 | 89.59 | 92.12 |
| TopHat1 ann           | 70.45                                                              | 58.86      | 44.22     | 67.64       | 63.39     | 96.58                                                                 | 88.91 | 88.37 | 88.47 | 89.72 |
| TopHat2               | 64.11                                                              | 56.92      | 38.39     | 65.37       | 60.55     | 96.96                                                                 | 95.63 | 95.37 | 95.62 | 95.36 |
| TopHat2 ann           | 73.8                                                               | 68.66      | 64.37     | 71.27       | 73.97     | 96.37                                                                 | 91.22 | 88.94 | 91.42 | 91.34 |
| GSNAP                 | 68.15                                                              | 23.82      | 8.97      | 22.19       | 3.86      | 95.39                                                                 | 86.77 | 82.22 | 93.58 | 96.0  |
| GSNAP ann             | 90.99                                                              | 76.41      | 56.16     | 78.55       | 60.96     | 97.41                                                                 | 92.81 | 88.85 | 94.33 | 96.09 |

**Supplementary Table 5** Recall and precision [in %] for spliced reads with different number of spanned junctions for simulation 1 and 2. Columns marked with an asterisk show results only for reads for which all exons except the first and last exon had length  $\geq 20$  nt.



| Program                        | Recall for individual insertion lengths |      |      |      |      |      |      |      | Precision for individual insertion lengths |      |      |      |      |      |      |      |
|--------------------------------|-----------------------------------------|------|------|------|------|------|------|------|--------------------------------------------|------|------|------|------|------|------|------|
|                                | 1                                       | 2    | 3    | 4    | 5    | 6    | 7    | 8    | 1                                          | 2    | 3    | 4    | 5    | 6    | 7    | 8    |
| <b>Simulation 1 Insertions</b> |                                         |      |      |      |      |      |      |      |                                            |      |      |      |      |      |      |      |
| CM Bwt1                        | 56.6                                    | 60.0 | 57.0 | 0.0  | 0.0  | 0.0  | 0.0  | 0.0  | 96.9                                       | 97.7 | 93.7 | -    | -    | -    | -    | -    |
| CM Bwt2                        | 72.0                                    | 77.8 | 74.1 | 1.6  | 0.5  | 0.0  | 0.0  | 0.0  | 97.0                                       | 98.2 | 93.3 | 69.6 | 30.7 | 0.0  | -    | 0.0  |
| CM Bwa                         | 78.9                                    | 83.5 | 82.7 | 69.9 | 70.3 | 60.1 | 73.4 | 64.1 | 97.9                                       | 98.3 | 95.8 | 92.0 | 92.5 | 92.4 | 93.7 | 37.0 |
| CM Bwa ann                     | 79.2                                    | 83.7 | 83.0 | 69.9 | 70.3 | 60.1 | 73.4 | 64.1 | 98.0                                       | 98.4 | 96.0 | 92.0 | 92.4 | 92.4 | 93.6 | 37.2 |
| MapSplice 2                    | 73.7                                    | 60.4 | 59.8 | 55.1 | 50.7 | 39.7 | 0.0  | 0.0  | 97.4                                       | 98.2 | 97.0 | 93.1 | 94.8 | 90.6 | -    | -    |
| STAR 1-pass                    | 49.8                                    | 49.5 | 48.0 | 45.6 | 40.4 | 26.8 | 40.8 | 31.5 | 97.6                                       | 98.4 | 97.1 | 96.2 | 97.5 | 99.1 | 98.5 | 95.6 |
| STAR 1-pass ann                | 55.8                                    | 54.5 | 51.7 | 47.4 | 51.9 | 28.5 | 41.0 | 41.8 | 97.9                                       | 98.3 | 96.8 | 96.1 | 96.5 | 99.1 | 98.6 | 96.6 |
| STAR 2-pass                    | 54.4                                    | 53.8 | 51.2 | 47.3 | 51.3 | 27.7 | 41.1 | 41.8 | 97.8                                       | 98.4 | 97.2 | 96.3 | 97.9 | 82.7 | 98.5 | 91.9 |
| STAR 2-pass ann                | 56.1                                    | 54.9 | 51.9 | 47.8 | 51.9 | 28.7 | 41.1 | 41.8 | 97.9                                       | 98.3 | 96.8 | 96.1 | 97.9 | 99.1 | 98.5 | 96.6 |
| TopHat1                        | 65.9                                    | 72.7 | 72.2 | 0.0  | 0.0  | 0.0  | 0.0  | 0.0  | 94.8                                       | 96.2 | 90.3 | -    | -    | -    | -    | -    |
| TopHat1 ann                    | 68.8                                    | 76.0 | 74.9 | 0.0  | 0.0  | 0.0  | 0.0  | 0.0  | 94.9                                       | 96.4 | 90.7 | -    | -    | -    | -    | -    |
| TopHat2                        | 70.5                                    | 72.5 | 69.6 | 65.9 | 64.0 | 55.0 | 70.0 | 52.4 | 88.0                                       | 89.7 | 76.8 | 63.5 | 38.2 | 18.3 | 21.4 | 1.1  |
| TopHat2 ann                    | 84.8                                    | 86.0 | 84.8 | 82.7 | 86.8 | 85.9 | 86.4 | 90.1 | 94.0                                       | 94.1 | 85.9 | 81.3 | 65.2 | 41.5 | 43.5 | 4.2  |
| GSNAP                          | 85.2                                    | 87.2 | 85.8 | 53.9 | 54.2 | 49.6 | 54.7 | 54.6 | 91.1                                       | 88.1 | 67.8 | 87.9 | 93.7 | 62.7 | 86.2 | 18.0 |
| GSNAP ann                      | 87.0                                    | 88.5 | 87.2 | 53.9 | 54.9 | 50.7 | 55.3 | 54.9 | 95.5                                       | 95.7 | 82.7 | 89.2 | 92.9 | 67.7 | 93.9 | 52.1 |
| <b>Simulation 1 Deletions</b>  |                                         |      |      |      |      |      |      |      |                                            |      |      |      |      |      |      |      |
| Program                        | Recall for individual deletion lengths  |      |      |      |      |      |      |      | Precision for individual deletion lengths  |      |      |      |      |      |      |      |
|                                | 1                                       | 2    | 3    | 4    | 5    | 6    | 7    | 8    | 1                                          | 2    | 3    | 4    | 5    | 6    | 7    | 8    |
| CM Bwt1                        | 61.2                                    | 60.1 | 58.0 | 54.1 | 69.7 | 43.5 | 51.1 | 50.3 | 97.7                                       | 97.1 | 91.8 | 95.3 | 92.2 | 60.8 | 92.4 | 84.9 |
| CM Bwt2                        | 74.8                                    | 73.3 | 73.3 | 64.1 | 80.6 | 68.3 | 52.9 | 61.0 | 97.7                                       | 97.3 | 93.9 | 87.2 | 93.4 | 85.0 | 81.4 | 93.1 |
| CM Bwa                         | 78.9                                    | 76.7 | 79.1 | 67.5 | 84.8 | 73.6 | 51.3 | 66.2 | 98.3                                       | 97.9 | 94.9 | 95.0 | 93.0 | 77.8 | 82.8 | 79.4 |
| CM Bwa ann                     | 79.3                                    | 77.2 | 79.4 | 69.4 | 85.0 | 73.6 | 51.3 | 67.2 | 98.3                                       | 98.1 | 95.0 | 96.4 | 93.1 | 77.9 | 92.2 | 79.6 |
| MapSplice 2                    | 77.9                                    | 76.0 | 79.9 | 68.0 | 83.3 | 63.7 | 0.0  | 0.0  | 98.4                                       | 98.7 | 94.9 | 96.4 | 99.3 | 99.9 | -    | -    |
| STAR 1-pass                    | 57.1                                    | 56.2 | 59.6 | 47.0 | 54.9 | 43.1 | 28.7 | 29.9 | 97.9                                       | 97.3 | 94.9 | 96.2 | 95.3 | 96.2 | 91.8 | 66.4 |
| STAR 1-pass ann                | 64.5                                    | 62.5 | 65.0 | 53.7 | 57.9 | 43.8 | 29.1 | 30.8 | 98.4                                       | 96.5 | 96.5 | 92.3 | 94.6 | 97.8 | 96.9 | 55.7 |
| STAR 2-pass                    | 63.2                                    | 60.2 | 64.0 | 52.5 | 55.9 | 43.8 | 29.1 | 30.2 | 98.6                                       | 97.6 | 96.6 | 96.2 | 95.3 | 97.6 | 92.0 | 55.6 |
| STAR 2-pass ann                | 64.9                                    | 62.8 | 65.7 | 54.2 | 57.9 | 43.8 | 29.1 | 30.8 | 98.5                                       | 96.6 | 96.6 | 92.3 | 94.6 | 97.8 | 96.9 | 55.7 |
| TopHat1                        | 69.7                                    | 69.2 | 71.0 | 0.0  | 0.0  | 0.0  | 0.0  | 0.0  | 95.3                                       | 96.2 | 92.6 | -    | -    | -    | -    | -    |
| TopHat1 ann                    | 72.6                                    | 72.6 | 73.7 | 0.0  | 0.0  | 0.0  | 0.0  | 0.0  | 95.4                                       | 96.4 | 92.8 | -    | -    | -    | -    | -    |
| TopHat2                        | 70.4                                    | 68.6 | 67.4 | 57.0 | 65.3 | 43.4 | 53.8 | 31.9 | 93.1                                       | 95.6 | 92.8 | 93.6 | 89.8 | 84.0 | 87.0 | 83.8 |
| TopHat2 ann                    | 84.0                                    | 82.0 | 81.3 | 73.6 | 81.5 | 66.9 | 72.9 | 37.9 | 95.7                                       | 96.3 | 94.2 | 91.6 | 93.5 | 77.7 | 93.8 | 64.3 |
| GSNAP                          | 86.5                                    | 83.8 | 85.9 | 78.9 | 81.9 | 76.2 | 68.9 | 70.3 | 92.4                                       | 87.7 | 71.0 | 47.7 | 24.7 | 9.8  | 74.3 | 57.0 |
| GSNAP ann                      | 87.7                                    | 85.8 | 87.0 | 82.7 | 83.3 | 78.3 | 84.6 | 74.1 | 96.2                                       | 93.9 | 87.6 | 85.3 | 66.8 | 48.1 | 89.7 | 63.6 |

Supplementary Table 6 Recall and precision for insertions and deletions in simulation 1.

| Program                        | Recall for individual insertion lengths |      |      |      |      |      |      |      | Precision for individual insertion lengths |      |      |      |      |      |      |      |
|--------------------------------|-----------------------------------------|------|------|------|------|------|------|------|--------------------------------------------|------|------|------|------|------|------|------|
|                                | 1                                       | 2    | 3    | 4    | 5    | 6    | 7    | 8    | 1                                          | 2    | 3    | 4    | 5    | 6    | 7    | 8    |
| <b>Simulation 2 Insertions</b> |                                         |      |      |      |      |      |      |      |                                            |      |      |      |      |      |      |      |
| CM Bwt1                        | 41.7                                    | 41.9 | 41.9 | 0.0  | 0.0  | 0.0  | 0.0  | 0.0  | 95.8                                       | 96.2 | 93.6 | -    | -    | -    | -    | -    |
| CM Bwt2                        | 58.3                                    | 58.1 | 59.7 | 0.1  | 0.1  | 0.0  | 0.0  | 0.2  | 96.2                                       | 96.3 | 94.2 | 63.7 | 94.9 | 0.0  | 0.0  | 44.4 |
| CM Bwa                         | 65.0                                    | 65.5 | 66.6 | 61.2 | 62.1 | 43.6 | 64.6 | 61.8 | 97.1                                       | 97.3 | 95.1 | 94.7 | 96.1 | 81.1 | 85.8 | 63.2 |
| CM Bwa ann                     | 65.2                                    | 65.7 | 66.8 | 61.4 | 67.6 | 44.2 | 64.7 | 61.8 | 97.1                                       | 97.3 | 95.1 | 94.6 | 96.4 | 81.3 | 85.8 | 65.6 |
| MapSplice 2                    | 54.6                                    | 42.8 | 42.7 | 38.3 | 42.9 | 33.2 | 0.0  | 0.0  | 95.5                                       | 96.6 | 96.0 | 94.4 | 94.5 | 85.3 | -    | -    |
| STAR 1-pass                    | 39.4                                    | 35.8 | 35.2 | 31.8 | 37.5 | 26.1 | 33.9 | 20.8 | 95.3                                       | 93.8 | 93.0 | 91.6 | 92.8 | 63.1 | 93.6 | 55.8 |
| STAR 1-pass ann                | 44.9                                    | 40.4 | 39.3 | 34.6 | 38.3 | 28.7 | 38.6 | 23.1 | 95.8                                       | 94.1 | 92.4 | 91.7 | 92.4 | 55.6 | 93.7 | 55.6 |
| STAR 2-pass                    | 44.3                                    | 40.2 | 39.2 | 34.2 | 38.3 | 31.2 | 38.2 | 23.0 | 95.8                                       | 94.3 | 92.5 | 91.9 | 92.3 | 60.2 | 93.7 | 53.8 |
| STAR 2-pass ann                | 45.4                                    | 41.0 | 40.0 | 34.9 | 38.3 | 28.9 | 39.0 | 23.1 | 95.9                                       | 94.1 | 92.5 | 91.7 | 92.3 | 55.7 | 93.7 | 54.9 |
| TopHat1                        | 52.2                                    | 54.6 | 54.0 | 0.0  | 0.0  | 0.0  | 0.0  | 0.0  | 93.0                                       | 94.9 | 93.3 | -    | -    | -    | -    | -    |
| TopHat1 ann                    | 54.7                                    | 57.3 | 56.3 | 0.0  | 0.0  | 0.0  | 0.0  | 0.0  | 93.3                                       | 95.1 | 93.5 | -    | -    | -    | -    | -    |
| TopHat2                        | 55.4                                    | 54.5 | 53.9 | 48.2 | 58.9 | 47.4 | 48.2 | 49.1 | 92.5                                       | 92.4 | 89.2 | 84.3 | 85.7 | 43.3 | 31.8 | 6.3  |
| TopHat2 ann                    | 67.9                                    | 67.8 | 68.2 | 69.6 | 67.9 | 62.1 | 67.6 | 61.1 | 94.6                                       | 94.7 | 92.7 | 89.4 | 91.2 | 55.3 | 49.5 | 7.5  |
| GSNAP                          | 78.3                                    | 78.8 | 78.9 | 41.7 | 48.2 | 43.1 | 47.3 | 38.5 | 93.2                                       | 92.8 | 87.5 | 93.8 | 96.5 | 76.5 | 84.2 | 50.1 |
| GSNAP ann                      | 80.0                                    | 80.9 | 81.4 | 42.1 | 48.3 | 43.7 | 47.7 | 38.1 | 94.1                                       | 94.1 | 91.0 | 93.1 | 96.8 | 77.8 | 90.0 | 62.6 |
| <b>Simulation 2 Deletions</b>  |                                         |      |      |      |      |      |      |      |                                            |      |      |      |      |      |      |      |
| Program                        | Recall for individual deletion lengths  |      |      |      |      |      |      |      | Precision for individual deletion lengths  |      |      |      |      |      |      |      |
|                                | 1                                       | 2    | 3    | 4    | 5    | 6    | 7    | 8    | 1                                          | 2    | 3    | 4    | 5    | 6    | 7    | 8    |
| CM Bwt1                        | 46.2                                    | 45.5 | 47.9 | 46.5 | 47.9 | 48.3 | 61.0 | 44.5 | 96.7                                       | 94.3 | 93.0 | 95.3 | 90.0 | 85.2 | 93.5 | 74.3 |
| CM Bwt2                        | 60.9                                    | 61.3 | 61.2 | 62.3 | 64.4 | 63.7 | 73.0 | 58.0 | 96.2                                       | 95.1 | 92.7 | 94.1 | 90.9 | 87.5 | 88.9 | 78.4 |
| CM Bwa                         | 66.4                                    | 66.0 | 67.1 | 64.7 | 66.9 | 70.5 | 76.6 | 59.9 | 97.4                                       | 95.7 | 94.3 | 95.8 | 90.7 | 88.2 | 92.6 | 64.6 |
| CM Bwa ann                     | 66.7                                    | 66.3 | 67.3 | 64.9 | 67.3 | 70.8 | 77.1 | 59.9 | 97.4                                       | 95.7 | 94.4 | 95.7 | 90.8 | 88.1 | 92.5 | 62.1 |
| MapSplice 2                    | 58.5                                    | 58.5 | 58.8 | 58.1 | 55.2 | 39.0 | 0.0  | 0.0  | 96.8                                       | 96.6 | 95.8 | 96.6 | 91.8 | 90.6 | -    | -    |
| STAR 1-pass                    | 45.0                                    | 44.3 | 44.3 | 43.3 | 38.3 | 34.6 | 36.0 | 31.9 | 95.7                                       | 94.3 | 91.5 | 92.5 | 87.3 | 89.2 | 90.1 | 88.3 |
| STAR 1-pass ann                | 50.1                                    | 49.9 | 48.5 | 47.0 | 43.1 | 41.2 | 38.0 | 33.2 | 96.0                                       | 94.1 | 91.7 | 90.2 | 87.9 | 87.6 | 90.4 | 60.5 |
| STAR 2-pass                    | 49.3                                    | 49.1 | 48.1 | 46.4 | 40.9 | 39.6 | 36.1 | 33.2 | 96.1                                       | 94.2 | 91.7 | 91.1 | 87.8 | 88.7 | 90.0 | 87.9 |
| STAR 2-pass ann                | 50.4                                    | 50.3 | 48.8 | 47.3 | 43.0 | 41.5 | 37.3 | 33.3 | 96.1                                       | 94.1 | 91.8 | 90.4 | 87.8 | 87.7 | 90.3 | 68.2 |
| TopHat1                        | 58.1                                    | 58.3 | 56.9 | 0.0  | 0.0  | 0.0  | 0.0  | 0.0  | 94.8                                       | 93.1 | 93.5 | -    | -    | -    | -    | -    |
| TopHat1 ann                    | 60.4                                    | 60.9 | 59.3 | 0.0  | 0.0  | 0.0  | 0.0  | 0.0  | 94.8                                       | 93.3 | 93.7 | -    | -    | -    | -    | -    |
| TopHat2                        | 56.1                                    | 54.6 | 51.2 | 48.8 | 42.8 | 43.7 | 46.9 | 37.9 | 93.8                                       | 94.1 | 94.2 | 93.7 | 91.2 | 91.8 | 95.7 | 85.0 |
| TopHat2 ann                    | 66.5                                    | 65.4 | 62.9 | 61.1 | 55.3 | 59.0 | 55.3 | 46.5 | 94.7                                       | 95.0 | 94.5 | 92.8 | 91.3 | 91.7 | 95.8 | 53.1 |
| GSNAP                          | 79.1                                    | 79.4 | 78.2 | 74.6 | 72.3 | 76.3 | 60.6 | 61.2 | 93.4                                       | 91.5 | 86.1 | 79.1 | 64.4 | 38.9 | 87.5 | 47.0 |
| GSNAP ann                      | 80.6                                    | 81.0 | 80.0 | 78.3 | 75.9 | 79.3 | 72.1 | 71.4 | 94.1                                       | 92.8 | 89.3 | 88.2 | 82.8 | 65.9 | 87.7 | 49.8 |

Supplementary Table 7 Recall and precision for insertions and deletions in simulation 2.
